# Supplementary material
Source: PubMed Central journal article supplement (PMC6703834)
Supplement: NIHMS947222-supplement-supplement_1.pdf [file NIHMS947222-supplement-supplement_1.pdf]

## E-CIGARETTES AND SMOKING CESSATION 1

**Supplementary Table 1. Bivariate analyses examining predictors of e-cigarette purchases among consistent smokers**

| Variable                                 | All Consistent Smokers |          | Never Purchasers |          | Single Purchasers |          | Repeat Purchasers |          | p      |
|------------------------------------------|------------------------|----------|------------------|----------|-------------------|----------|-------------------|----------|--------|
|                                          | M or N                 | SD or %  | M or N           | SD or %  | M or N            | SD or %  | M or N            | SD or %  |        |
| <i>Sociodemographics</i>                 |                        |          |                  |          |                   |          |                   |          |        |
| Age (SD)                                 | 58.86                  | 9.72     | 58.97            | 9.84     | 57.32             | 8.94     | 58.99             | 8.89     | 0.153  |
| Race (%)                                 |                        |          |                  |          |                   |          |                   |          |        |
| Black                                    | 304                    | 10.65%   | 267              | 10.88%   | 23                | 11.44%   | 14                | 7.04%    | 0.223  |
| White                                    | 2408                   | 84.37%   | 2066             | 84.19%   | 168               | 83.58%   | 174               | 87.44%   | 0.455  |
| Asian                                    | 30                     | 1.05%    | 26               | 1.06%    | 3                 | 1.49%    | 1                 | 0.50%    | 0.621  |
| Other                                    | 112                    | 3.92%    | 95               | 3.87%    | 7                 | 3.48%    | 10                | 5.03%    | 0.683  |
| Ethnicity (%)                            |                        |          |                  |          |                   |          |                   |          |        |
| Hispanic                                 | 100                    | 3.50%    | 86               | 3.50%    | 6                 | 2.99%    | 8                 | 4.02%    | 0.854  |
| Non-Hispanic                             | 2754                   | 96.50%   | 2368             | 96.50%   | 195               | 97.01%   | 191               | 95.98%   | 0.854  |
| Household Composition (%)                |                        |          |                  |          |                   |          |                   |          |        |
| Single female                            | 519                    | 18.19%   | 440              | 17.93%   | 40                | 19.90%   | 39                | 19.60%   | 0.680  |
| Single male                              | 249                    | 8.72%    | 215              | 8.76%    | 19                | 9.45%    | 15                | 7.54%    | 0.783  |
| Multiple adults                          | 2086                   | 73.09%   | 1799             | 73.31%   | 142               | 70.65%   | 145               | 72.86%   | 0.714  |
| Income (SD)                              | \$47,926               | \$27,487 | \$48,204         | \$27,414 | \$46,776          | \$28,535 | \$45,663          | \$27,311 | 0.174  |
| <i>State Tobacco Control Environment</i> |                        |          |                  |          |                   |          |                   |          |        |
| % CDC control funding (SD)               | 17.61%                 | 13.68%   | 17.48%           | 13.71%   | 18.44%            | 14.33%   | 18.42%            | 12.72%   | 0.200  |
| State cigarette tax (SD)                 | \$1.28                 | \$0.82   | \$1.29           | \$0.82   | \$1.21            | \$0.82   | \$1.26            | \$0.82   | 0.256  |
| Smoke-free policy index (SD)             | 0.47                   | 0.25     | 0.47             | 0.25     | 0.45              | 0.26     | 0.44              | 0.26     | 0.025  |
| <i>Smoking Characteristics</i>           |                        |          |                  |          |                   |          |                   |          |        |
| Menthol (%)                              | 925                    | 32.41%   | 799              | 32.56%   | 64                | 31.84%   | 62                | 31.16%   | 0.906  |
| 20-Pack price (SD)                       | \$4.92                 | \$1.40   | \$4.96           | \$1.43   | \$4.70            | \$1.19   | \$4.65            | \$1.19   | <0.001 |
| Monthly cigarette volume (SD)            | 21.28                  | 20.76    | 20.59            | 20.35    | 25.01             | 23.22    | 26.13             | 22.16    | <0.001 |
| Purchase frequency (SD)                  | 16.60                  | 18.29    | 16.99            | 18.51    | 16.31             | 19.70    | 12.17             | 12.62    | 0.004  |
| Recency (SD)                             | 16.35                  | 23.39    | 16.54            | 23.71    | 15.20             | 20.11    | 15.14             | 22.56    | 0.275  |

E-CIGARETTES AND SMOKING CESSATION 2

|                   |      |        |      |        |     |        |     |        |       |
|-------------------|------|--------|------|--------|-----|--------|-----|--------|-------|
| NRT purchases (%) |      |        |      |        |     |        |     |        |       |
| Never             | 2502 | 87.67% | 2168 | 88.35% | 169 | 84.08% | 165 | 82.91% | 0.022 |
| Single            | 167  | 5.85%  | 137  | 5.58%  | 15  | 7.46%  | 15  | 7.54%  | 0.317 |
| Repeat            | 185  | 6.48%  | 149  | 6.07%  | 17  | 8.46%  | 19  | 9.55%  | 0.080 |
| Cessation (%)     | 484  | 16.96% | 423  | 17.24% | 22  | 10.95% | 39  | 19.60% | 0.043 |

---

**Note: M is the mean, N is the count, SD is the standard deviation around the mean, % is the share of the total sample represented by the count**
